# Supplementary material for: Microsatellite polymorphism among Chrysanthemum sp. polyploids: the influence of whole genome duplication
Source: PubMed Central journal article supplement — Sci Rep. 2014 Oct 23;4:6730. doi: 10.1038/srep06730 (PMC4206843; doi:10.1038/srep06730), 2014-10-23
Supplement: srep06730-s1.pdf [file srep06730-s1.pdf]

**Title:** Microsatellite polymorphism among *Chrysanthemum* sp. polyploids: the influence of whole genome duplication

**Authors:** Haibin Wang; Xiangyu Qi; Ri Gao; Jingjing Wang, Bin Dong; Jiafu Jiang; Sumei Chen; Zhiyong Guan;

Weimin Fang; Yuan Liao; Fadi Chen

### **Supplementary Information**

**Supplementary Fig. S1.** Variation in SSR sequence among diploid and autotetraploid *C. nankingense* plants.

**Supplementary Fig. S2.** Variation in SSR sequence among diploid and autotetraploid *C. lavandulifolium* plants.

**Supplementary Fig. S3.** Changed transcription patterns of SSR-containing genes upon autopolyploidization.

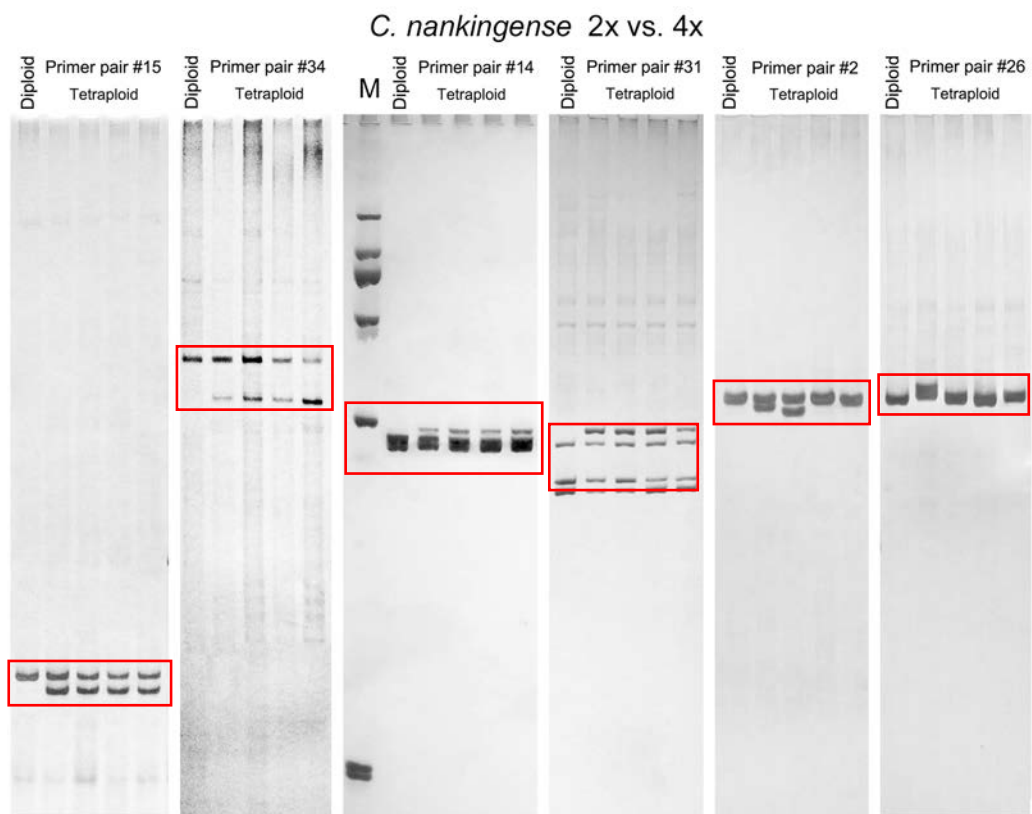

**Supplementary Fig. S1.** Variation in SSR sequence among diploid and autotetraploid *C. nankingense* plants. The gels have been run under the same experimental conditions.

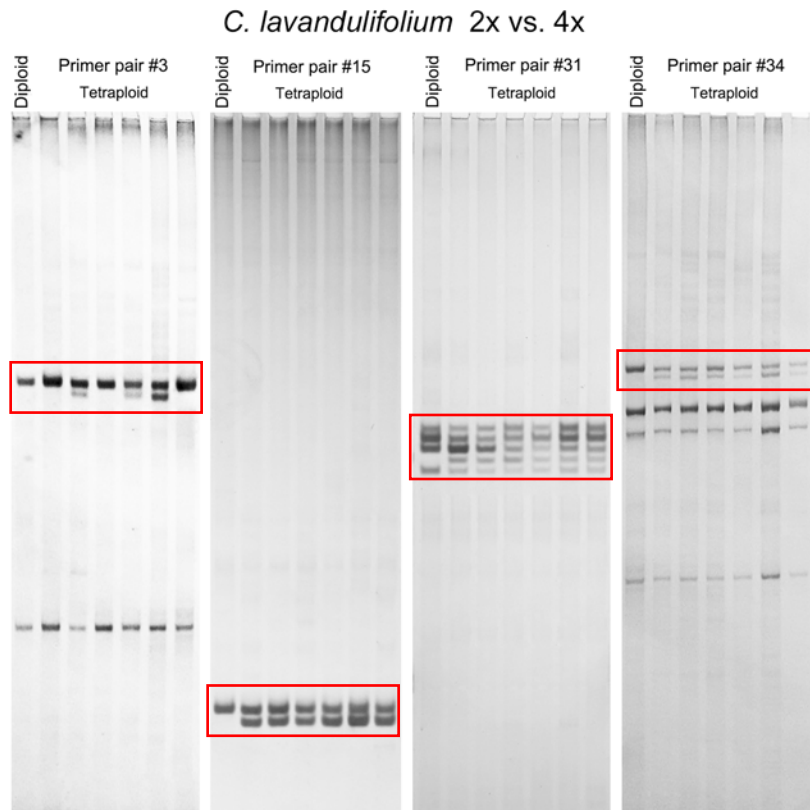

**Supplementary Fig. S2.** Variation in SSR sequence among diploid and autotetraploid *C. lavandulifolium* plants. The gels have been run under the same experimental conditions.

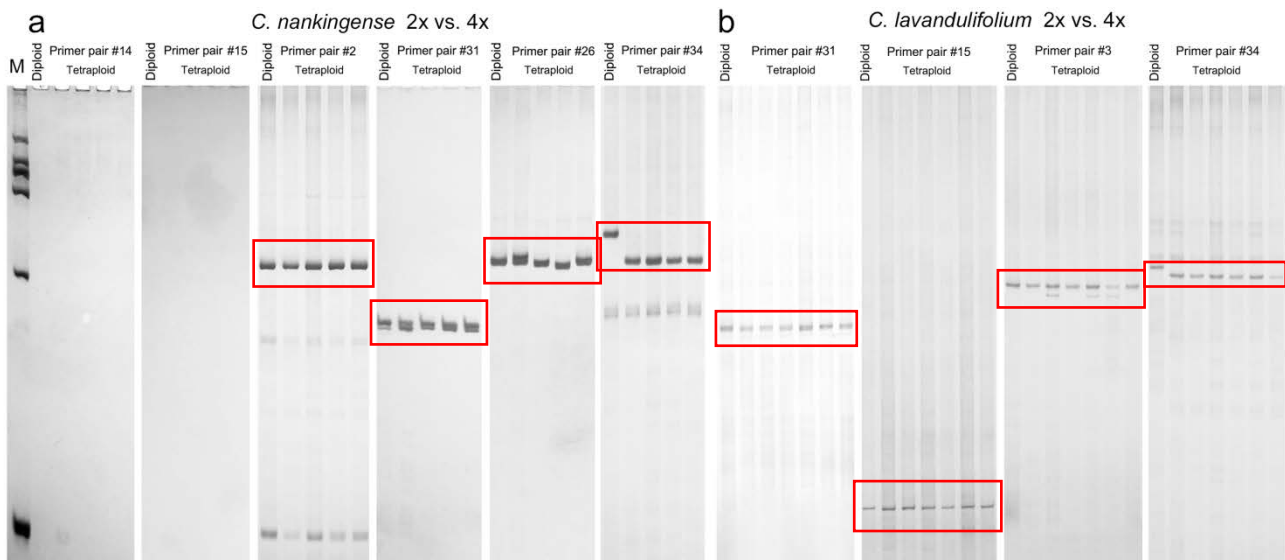

**Supplementary Fig. S3.** Changed transcription patterns of SSR-containing genes upon autopolyploidization. (a) *C. nankingense*; (b) *C. lavandulifolium*. No amplicons were produced from either the diploid or any of the four tetraploid *C. nankingense* cDNA templates using primer pairs #14 or #15, while primer pairs #2 and #31 in autotetraploid *C. nankingense* and primer pairs #31 and #15 in autotetraploid *C. lavandulifolium* produced an identical amplicon from all five templates. Primer pair #26 detected transcription changes in two of the four tetraploid *C. nankingense* plants and primer pair #3 detected transcription changes in three of six autotetraploid *C. lavandulifolium* plants. Primer pair #34 detected transcription in all autotetraploid but not in the diploid. The gels have been run under the same experimental conditions.
